# Supplementary material for: A Novel Feeder-Free Culture System for Expansion of Mouse Spermatogonial Stem Cells
Source: PubMed Central journal article supplement — Mol Cells. 2014 May 23;37(6):473–9. doi: 10.14348/molcells.2014.0080 (PMC4086341; doi:10.14348/molcells.2014.0080), 2014-05-23
Supplement: molcell-37-6-473-supplementary.pdf [file molcell-37-6-473-supplementary.pdf]

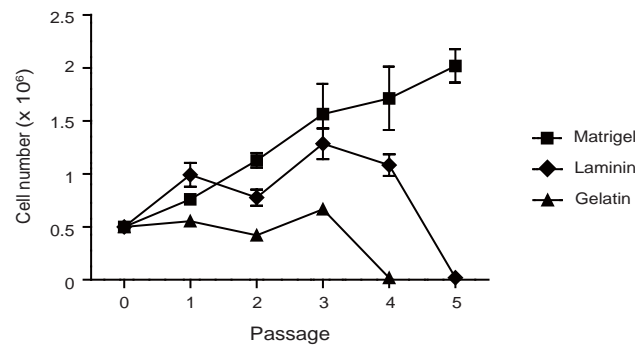

**Supplementary figure 1. Comparison of SSC numbers on various extracellular matrixes.** SSCs were plated at  $5 \times 10^5$  cells/well in 12 well plates on Matrigel, Laminin and Gelatin, and the cell numbers was then counted at every subculture until 5 passages.

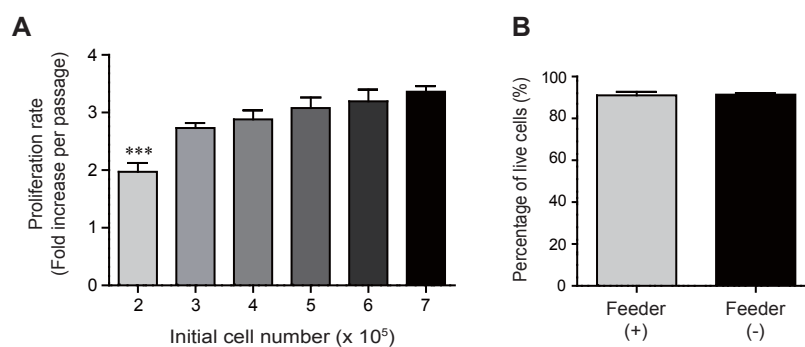

**Supplementary figure 2. Cell number dependent SSC proliferation on Matrigel.** (A) SSCs were plated at various cell number densities (2 - 7 × 10<sup>5</sup> cells/well in 12 well plate) and the cell proliferation rate was then analyzed after 5 days of culture. (B) Percentage of live cell number in 5 × 10<sup>5</sup> cells/well in 12 well plate on feeder or Matrigel. (\*\*\*) : P < 0.0004)

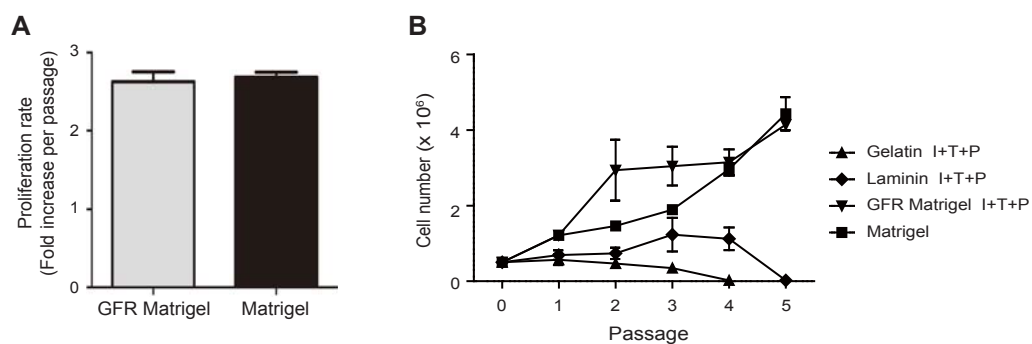

**Supplementary figure 3. SSCs cultured on growth factor reduced (GFR)-Matrigel and standard Matrigel.** (A) Comparison of SSC proliferation rate between GFR-Matrigel and standard Matrigel. (B) Effects of various growth factors on Gelatin, Laminin and GFR Matrigel. SSCs were seeded at  $5 \times 10^5$  cells/well in 12-well plates on Gelatin, Laminin and GFR-Matrigel with insulin growth factor-1 (IGF-1), transforming growth factor beta (TGF- $\beta$ ) and platelet-derived growth factor (PDGF), and the cell numbers was then counted every subculture until 5 passages. I; IGF-1, T; TGF- $\beta$ , P; PDGF.

**Supplementary table 1. Sequences of primer sets used for the detection of SSC-specific markers and bisulfite sequencing**

| Gene             | Sequence                                                                              | Reaction                 | Tm (°C) |
|------------------|---------------------------------------------------------------------------------------|--------------------------|---------|
| <i>Oct4</i>      | F-CTG AGG GCC AGG CAG GAG CAC GAG<br>R-CTG TAG GGA GGG CTT CGG GCA CTT                | RT-PCR                   | 67      |
| <i>Nanog</i>     | F-AGG GTC TGC TAC TGA GAT GCT CTG<br>R-CAA CCA CTG GTT TTT CTG CCA CCG                | RT-PCR                   | 58      |
| <i>Rex1</i>      | F-CAC CAT CCG GGA TGA AAG TGA GAT<br>R-ACC AGA AAA TGT CGC TTT AGT TTC                | RT-PCR                   | 58      |
| <i>Esg1</i>      | F-ATA AGC TTG ATC TCG TCT TCC<br>R-CTT GCT AGG ATG TAA CAA AGC                        | RT-PCR                   | 51      |
| <i>Tex18</i>     | F-GGG GAG GGA GTA GTA CCT GTT T<br>R-CCA CAC CCT GGA TAC TTC ACT T                    | RT-PCR                   | 58      |
| <i>VASA</i>      | F-CTT GCA GAG ATG TTC AGC AGA C<br>R-CTC CAA GAG CTT GCT CTC TCT C                    | RT-PCR                   | 58      |
| <i>Dazl</i>      | F-GCA CTC AGT CTT CAT CAG CAA C<br>R-CTA TCT TCT GCA CAT CCA CGT C                    | RT-PCR                   | 58      |
| <i>Piwil2</i>    | F- CCT CCT GTA ACT GGG AAC TTG G<br>R-GCA CCA CAA CAC CCT ACT ATG A                   | RT-PCR                   | 58      |
| <i>Zfp145</i>    | F-TGC TGC CCA ACC ACA AGG<br>R-CGC TGA ATG AGC CAG TAA AT                             | RT-PCR                   | 58      |
| <i>β-actin</i>   | F-CGT GCG TGA CAT CAA AGA GAA GC<br>R- ATC TGC TGG AAG GTG GAC AGT GAG                | RT-PCR                   | 58      |
| <i>H19 1st</i>   | F-TAA GGA GAT TAT GTT TTA TTT TTG GA<br>R-CCC CCT AAT AAC ATT TAT AAC CCC             | Bisulfite sequencing PCR | 50      |
| <i>H19 2nd</i>   | F-AAG GAG ATT ATG TTT TAT TTT TGG A<br>R-AAA CTT AAA TAA CCC ACA ACA TTA CC           | Bisulfite sequencing PCR | 50      |
| <i>Peg1 1st</i>  | F-TAG GGG TTT GTT TTG TTG TTT A<br>R-AAC CTA TAA ATA TCT TCC CAT A                    | Bisulfite sequencing PCR | 56      |
| <i>Peg1 2nd</i>  | F-GAT ATG ATA GAA AAT ATT TTG A<br>R-TAA AAA TAC CAA CAC CTA AAA A                    | Bisulfite sequencing PCR | 50      |
| <i>Igf2r 1st</i> | F-GTA GAG TTT TTT GAA TTT TTT TGT T<br>R-TAA ACT ATA ATT CTA ATT ATA CCA AAT TAC      | Bisulfite sequencing PCR | 50      |
| <i>Igf2r 2nd</i> | F-TGG TAT TTT TAT GTA TAG TTA GGA TAG<br>R-AAA AAT TCT ATA ATC AAA ACC AAC            | Bisulfite sequencing PCR | 50      |
| <i>Snrpn 1st</i> | F-TAT GTA ATA TGA TAT AGT TTA GAA ATT AGT<br>R-AAT AAA CCC AAA TCT AAA ATA TTT TAA TC | Bisulfite sequencing PCR | 54      |
| <i>Snrpn 2nd</i> | F-TAG AGG GAT AGA GAT TTT TGT ATT G<br>R-ACT AAA ATC CAC AAA CCC AAC TAA C            | Bisulfite sequencing PCR | 54      |
